# Supplementary material
Source: PubMed Central journal article supplement (PMC2807731)

# Complementation of FA-G lymphoblasts with the *FANCG* gene

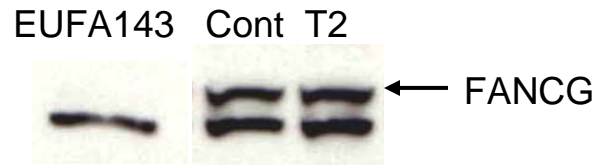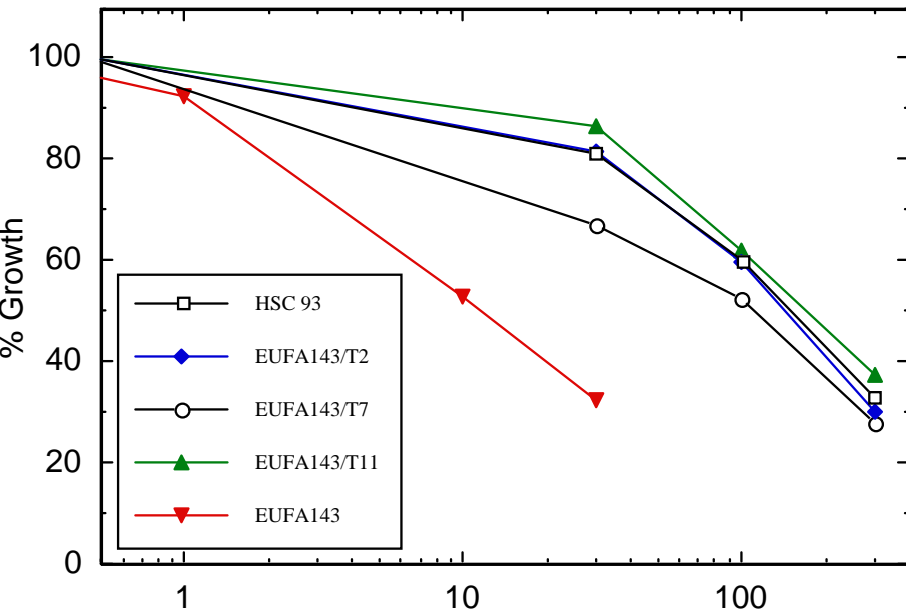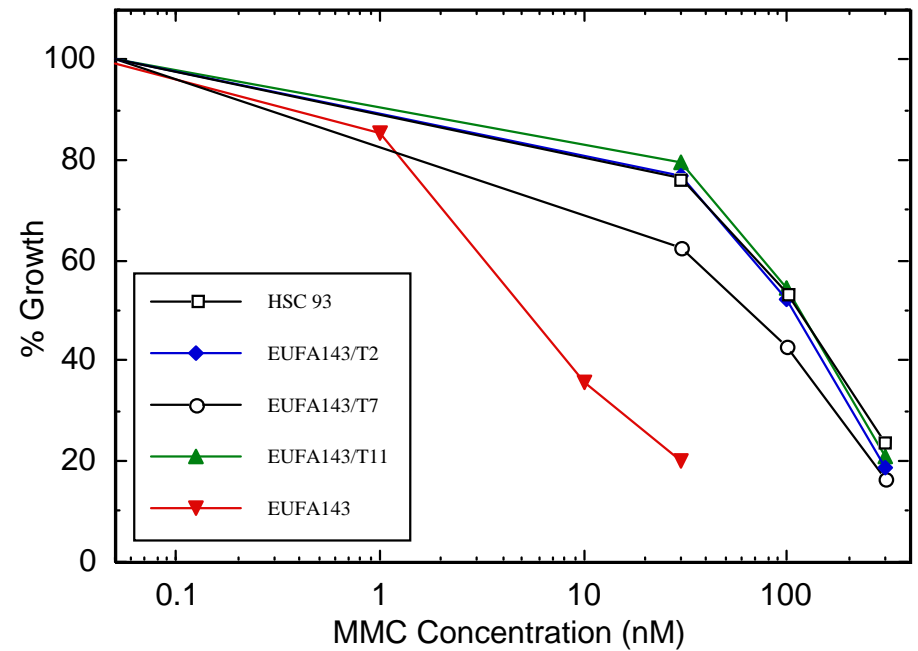

Supplement: NIHMS107331-supplement-01.pdf [file NIHMS107331-supplement-01.pdf]
